# Supplementary material for: Prediction of Aqueous Solution Surface Tension of Some Surfactant Mixtures and Composition of Their Monolayers at the Solution—Air Interface
Source: MDPI journal article supplement (doi:10.3390/colloids5040053), 2021-12-17
Supplement: s1 [file s1]

Archive with 1 entries (1 files):
- colloids-1478671-supplementary.pdf
